# Supplementary material for: RGD-expressed bacterial membrane-derived nanovesicles enhance cancer therapy via multiple tumorous targeting
Source: Theranostics. 2021 Jan 15;11(7):3301–16. doi: 10.7150/thno.51988 (PMC7847689; doi:10.7150/thno.51988)
Supplement: Supplementary file 1 — Supplementary figures. [file thnov11p3301s1.pdf]

# Supplementary Information

## **RGD-expressed bacterial membrane-derived nanovesicles loaded with doxorubicin enhance cancer therapy via multiple tumor targeting**

Jin Gao<sup>†</sup>, Sihan Wang<sup>†</sup>, Xinyue Dong, Zhenjia Wang\*

Department of Pharmaceutical Sciences, College of Pharmaceutical Sciences and Pharmacy,  
Washington State University, Spokane, WA 99202, USA

\*Correspondence should be addressed to Zhenjia Wang: [zhenjia.wang@wsu.edu](mailto:zhenjia.wang@wsu.edu)

<sup>†</sup> represents the equal contribution to this work.

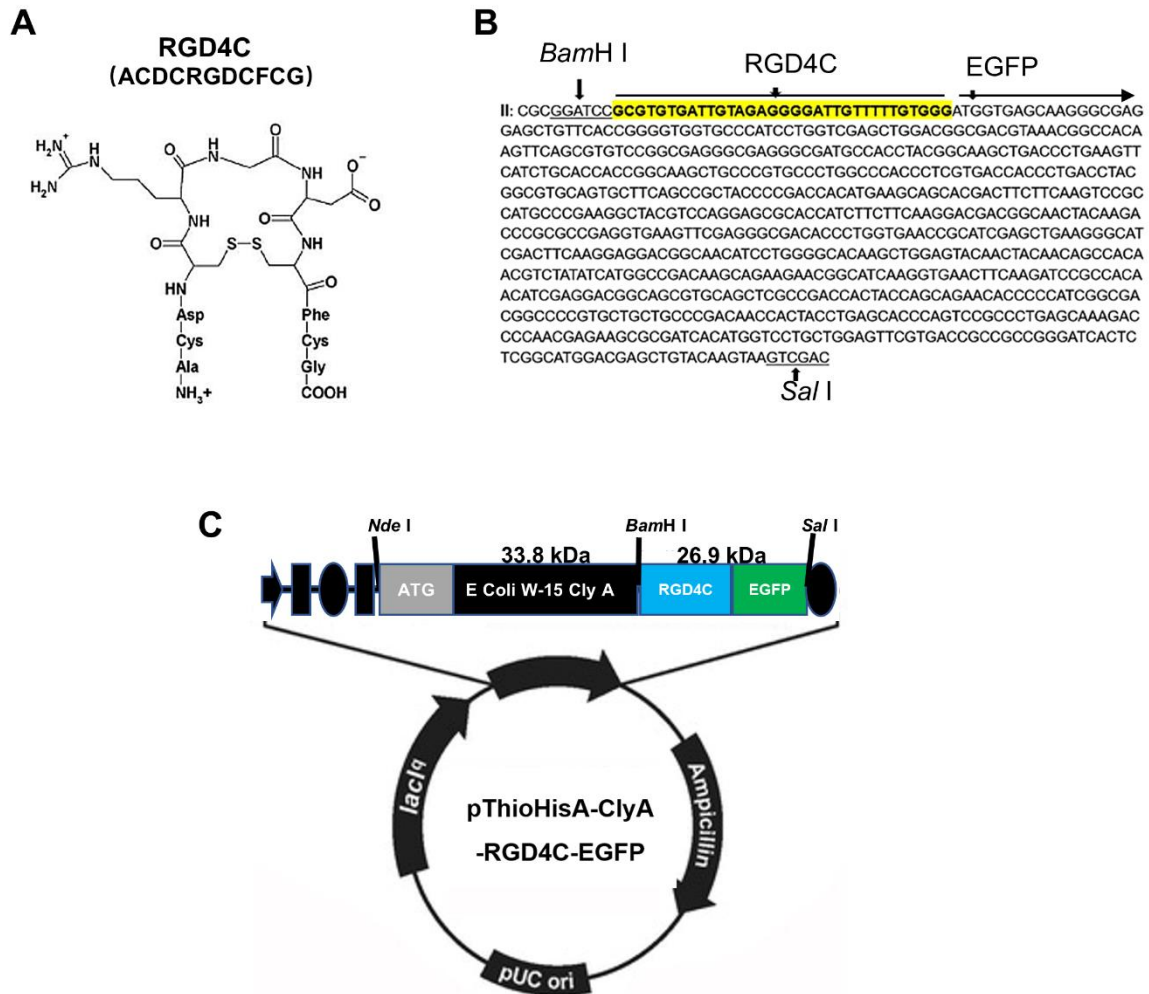

**Figure S1. Genetical engineering of a ClyA-RGD4C-EGFP fusion protein and nucleotide sequences of ClyA-RGD4C-EGFP. (A)** Chemical structure of RGD peptide. **(B)** Nucleotide sequence of RGD4C-EGFP. **(C)** Diagram of the recombinant plasmid expressing the fusion protein ClyA-RGD4C-EGFP with the thioredoxin sequence totally replaced by ClyA-RGD-EGFP's.

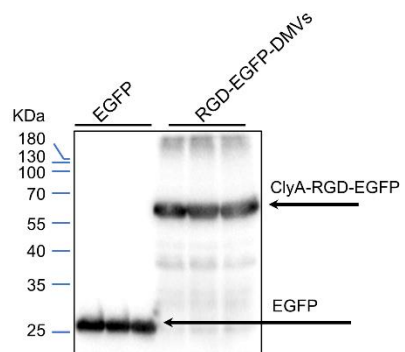

**Figure S2. Western blots (WB) of Cly A-RGD-EGFP-DMVs and EGFP.** In the experiment, RGD-EGFP-DMVs (20  $\mu$ g) and the standard EGFP (0.1  $\mu$ g) were loaded for WB, and 3 times of experiments were shown. Based on the EGFP intensity, we estimated the number of RGD-EGFP per DMVs.

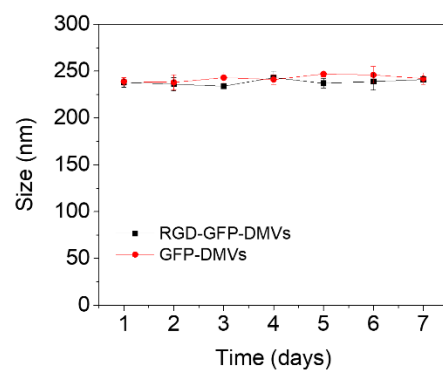

**Figure S3. Stability study result of EGFP-DMVs and RGD-EGFP-DMVs.** Sizes of EGFP-DMVs and RGD-EGFP-DMVs in serum (10%) at 4°C were measured by DLS each day for 7 days. Data were expressed as mean $\pm$ SD, n = 6.

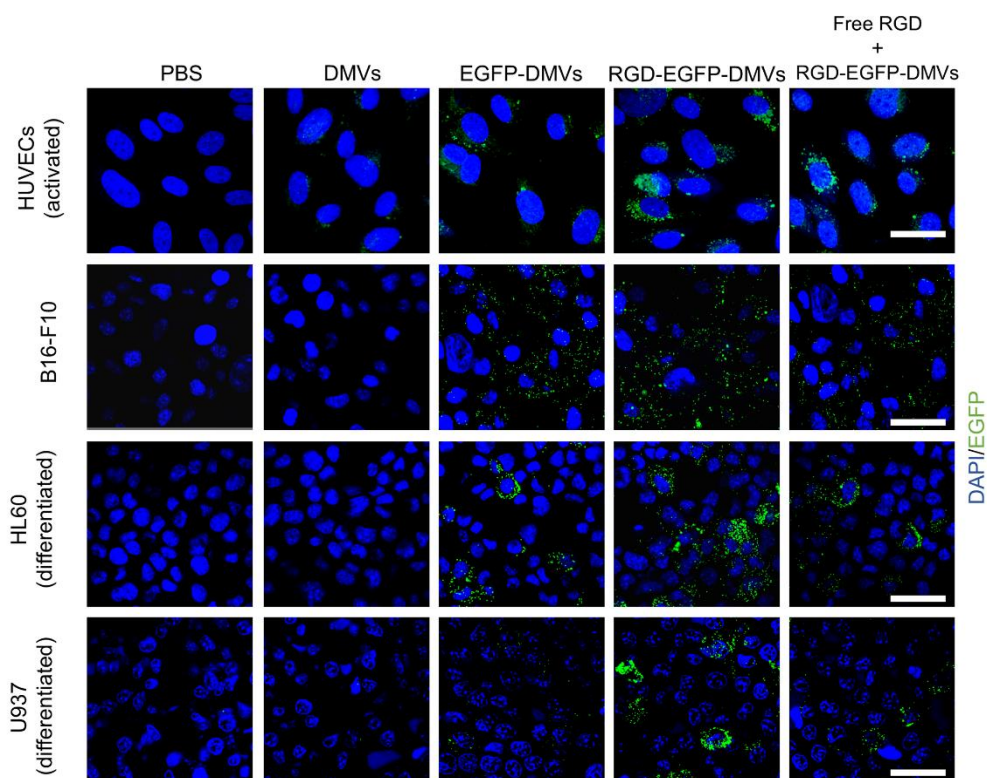

**Figure S4. Confocal images of the cellular uptake of DMVs, EGFP-DMVs or RGD-EGFP-DMVs by activated HUVECs, B16-F10 melanoma cells, differentiated HL60 cells (neutrophils like) and differentiated U937 (monocytes like).** The cells were incubated with 12  $\mu$ g DMVs with or without the blocking of free RGD peptides (10  $\mu$ M) for 60 min at 37°C. Scale bar = 25  $\mu$ m.

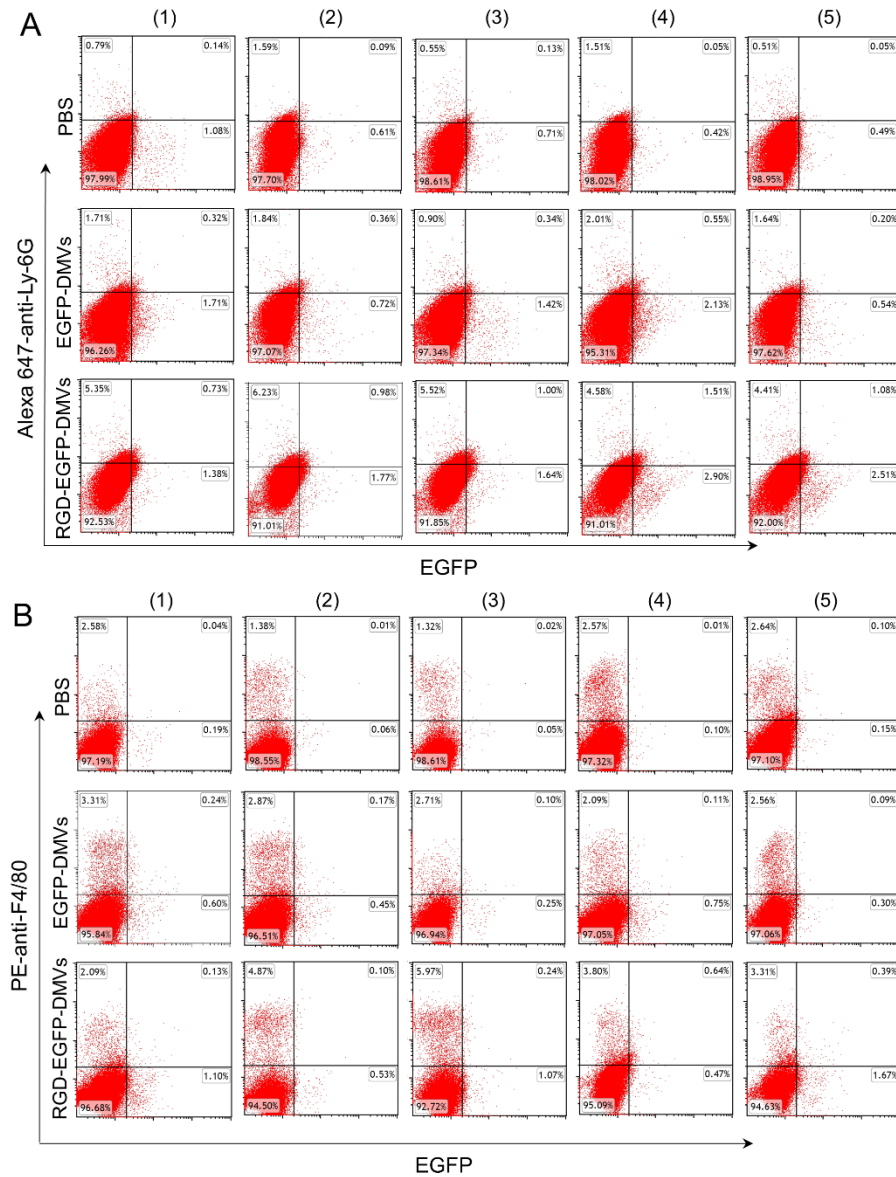

**Figure S5. Flow cytometry analysis of neutrophils, monocytes and the total cells containing DMVs in tumor tissues.** PBS, EGFP-DMVs and RGD-EGFP-DMVs were given to the melanoma-bearing mice respectively and tumor tissues were collected to get single cell suspensions for flow cytometry. The samples were stained with Alexa 647-anti-LY-6G for neutrophils (A) and PE-anti-F4/80 for monocytes (B), respectively. The number 1-5 represents 5 mice used in the experiments. The gating strategy was established based on the flow cytometry analysis of the single cells isolated from xenograft without DMV injection and cell marker staining.

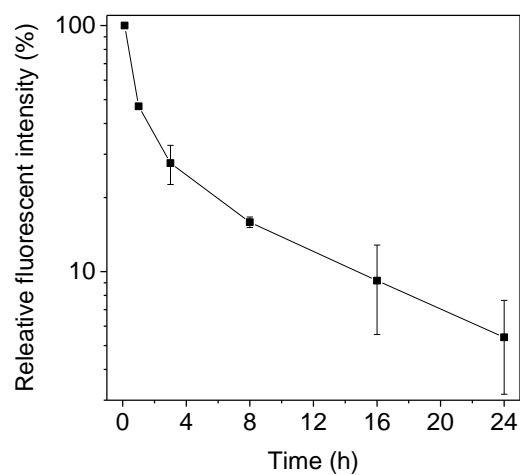

**Figure S6. Pharmacokinetics of RGD-EGFP-DMVs in the melanoma mouse model.** The plasma fluorescence intensity was measured when the tumor volume was around 50-100 mm<sup>3</sup>. The plasma was collected after the animals were iv injected 600 µg of DiR-DMVs and the fluorescence intensity was measured on a plate reader (n = 3, mean ± SD).

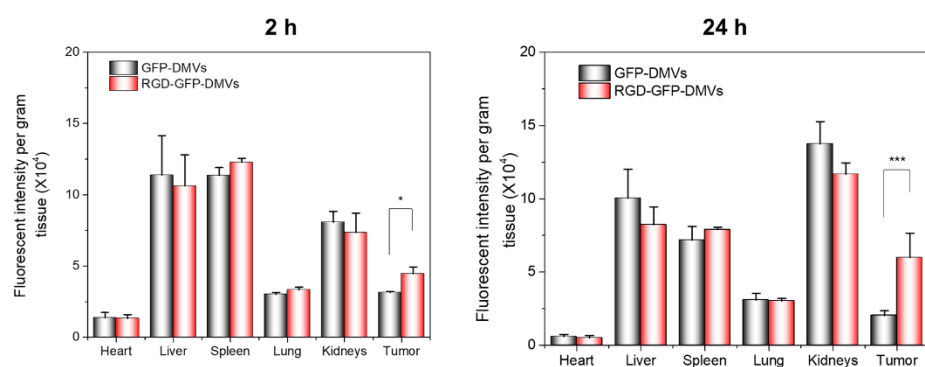

**Figure S7. Biodistribution of RGD-EGFP-DMVs.** 2 h and 24 h after DiR-RGD-EGFP-DMVs and DiR-EGFP-DMVs (equal fluorescent intensity, both at around 10 mg/kg in proteins) were *i.v.* administered to tumor bearing mice, the fluorescent signals were measured after tissues were homogenized (n = 3, mean  $\pm$  SD).

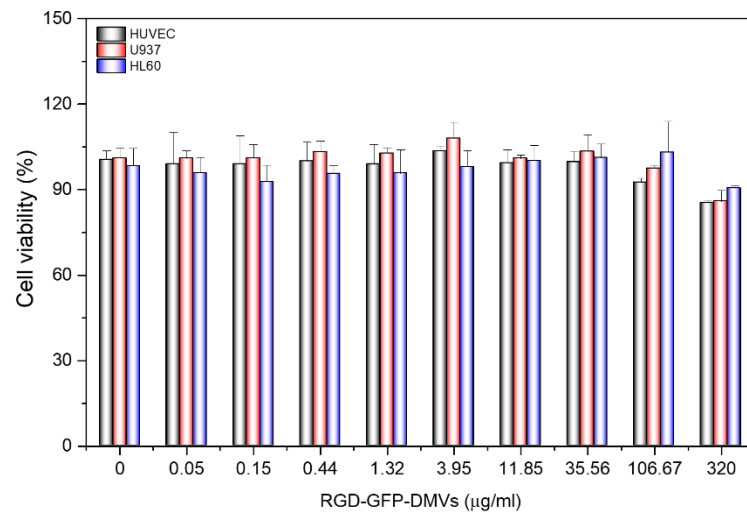

**Figure S8. Toxicity of RGD-EGFP-DMVs on HUVECs, U937 and HL60 cells.** 10 000 cells were incubated with RGD-EGFP-DMVs for 24 hours and 10  $\mu$ l MTS stock solution was added into each well. 4 hours later, the absorbance at 490 nm of the wells was measured on a plate reader (n = 4, mean  $\pm$  SD).

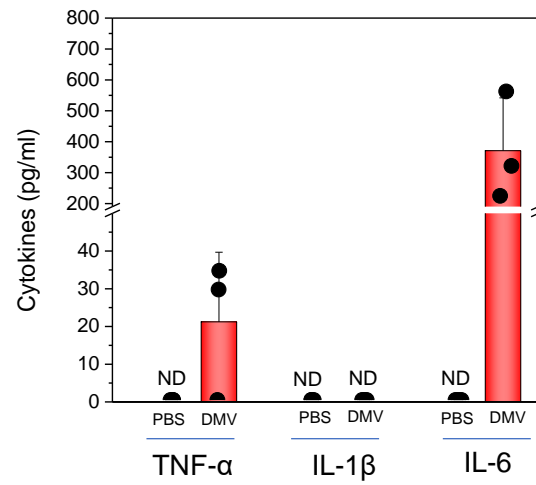

**Figure S9. Systemic immune responses of RD-EGFP-DMVs in the tumor mouse model.** Cytokines including TNF- $\alpha$ , IL-1 $\beta$  and IL-6 were measured by ELISA 24 h after administration of DMVs ( $n = 3$ , mean  $\pm$  SD) at 600  $\mu$ g of DiR-DMVs. The tumor volume was around 50-100 mm<sup>3</sup>.

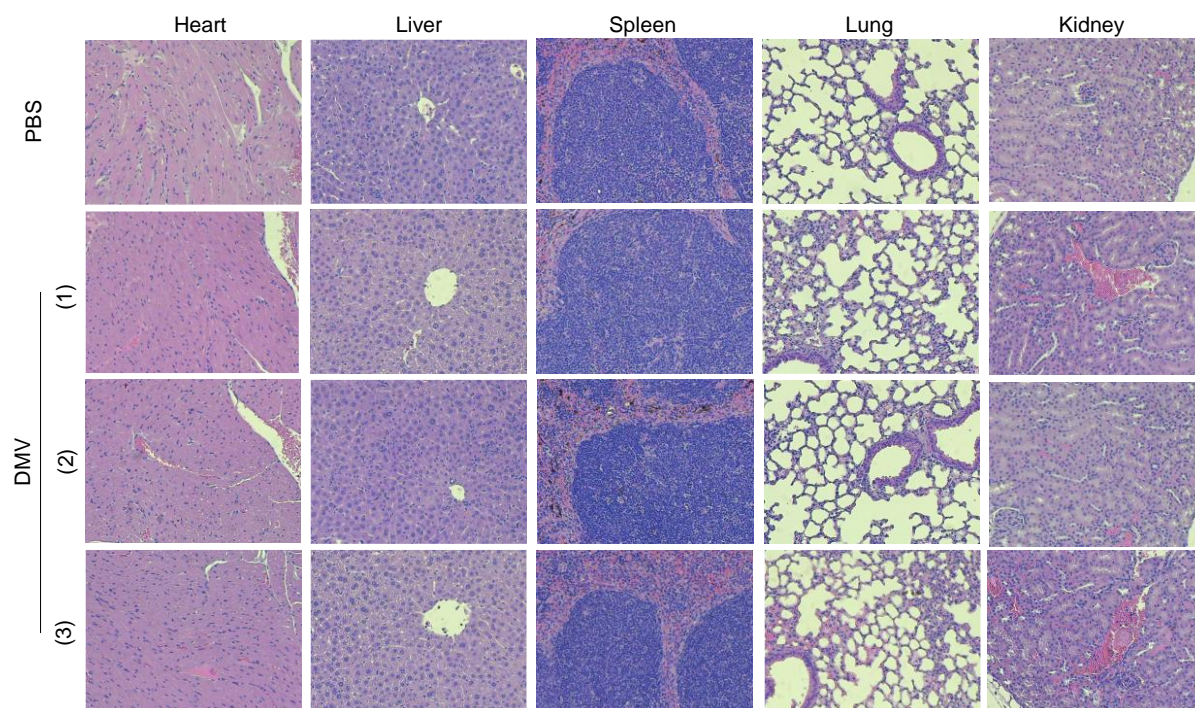

Fig. S10 Histology of heart, liver, spleen, lung and kidney in the B16-F10 mouse after the treatments by PBS or 600  $\mu$ g of DMVs. The sections were stained by H&E and the images were taken using a Leica DM2500 LED microscope (Original magnification,  $10 \times 20$ ;  $n = 3$ ). No visible histological difference between the PBS group and the group of DMVs. There were triplet experiments for the group of DMVs.
